# Supplementary material for: The Combination of ATM and Chk1 Inhibitors Induces Synthetic Lethality in Colorectal Cancer Cells
Source: MDPI journal article supplement (doi:10.3390/cancers15030735), 2023-01-25
Supplement: s1 [file s1]

## Supplementary Materials

### The combination of ATM and Chk1 inhibitors induces synthetic lethality in colorectal cancer cells

Yuri Tozaki, Hiromasa Aoki, Rina Kato, Kohki Toriuchi, Saki Sugino, Yasumichi Inoue, Hidetoshi Hayashi, Mineyoshi Aoyama

#### Components

Seven Supplemental Figures

Three Supplemental Tables

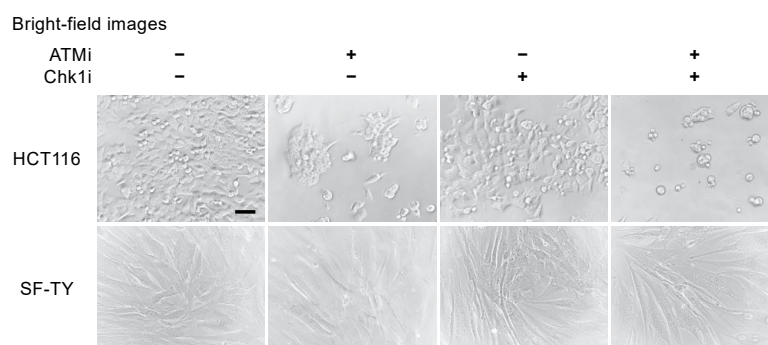

#### Figure S1. Bright-field images of drug-treated cells

Representative bright-field images of HCT116 and SF-TY cells after 48 h of treatment with the ATMi and/or Chk1i. Scale bar = 50  $\mu$ m.

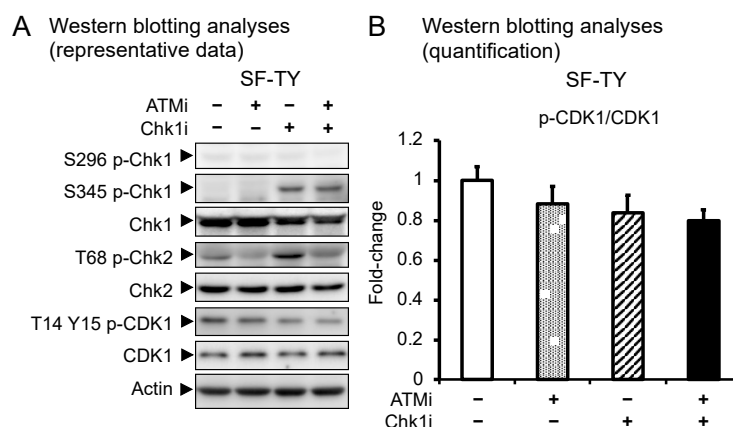

#### Figure S2. Phosphorylation of Chk1, Chk2, and CDK1 during drug treatment in SF-TY cells

(A) Western blotting analysis of Chk1, phospho-Chk1 (S296 and S345), Chk2, phospho-Chk2 (T68), CDK1, and phospho-CDK1 (T14 and T15) in SF-TY cells treated with ATMi (10  $\mu$ M), Chk1i (0.03  $\mu$ M), or both drugs for 6 h. (B) Quantification of the amount of each protein as determined by Western blotting in three cancer cell lines.

Protein levels were normalized to actin levels. Data are presented as mean  $\pm$  SE ( $n = 3$ ;  $\ddagger p < 0.05$ ; Tukey's multiple comparison test). Uncropped versions of the immunoblotting data are shown in Supplementary Figure S3A. The relative intensity of each band in the immunoblots is shown in Supplementary Figure S3B.

## A Uncropped versions of the immunoblot data

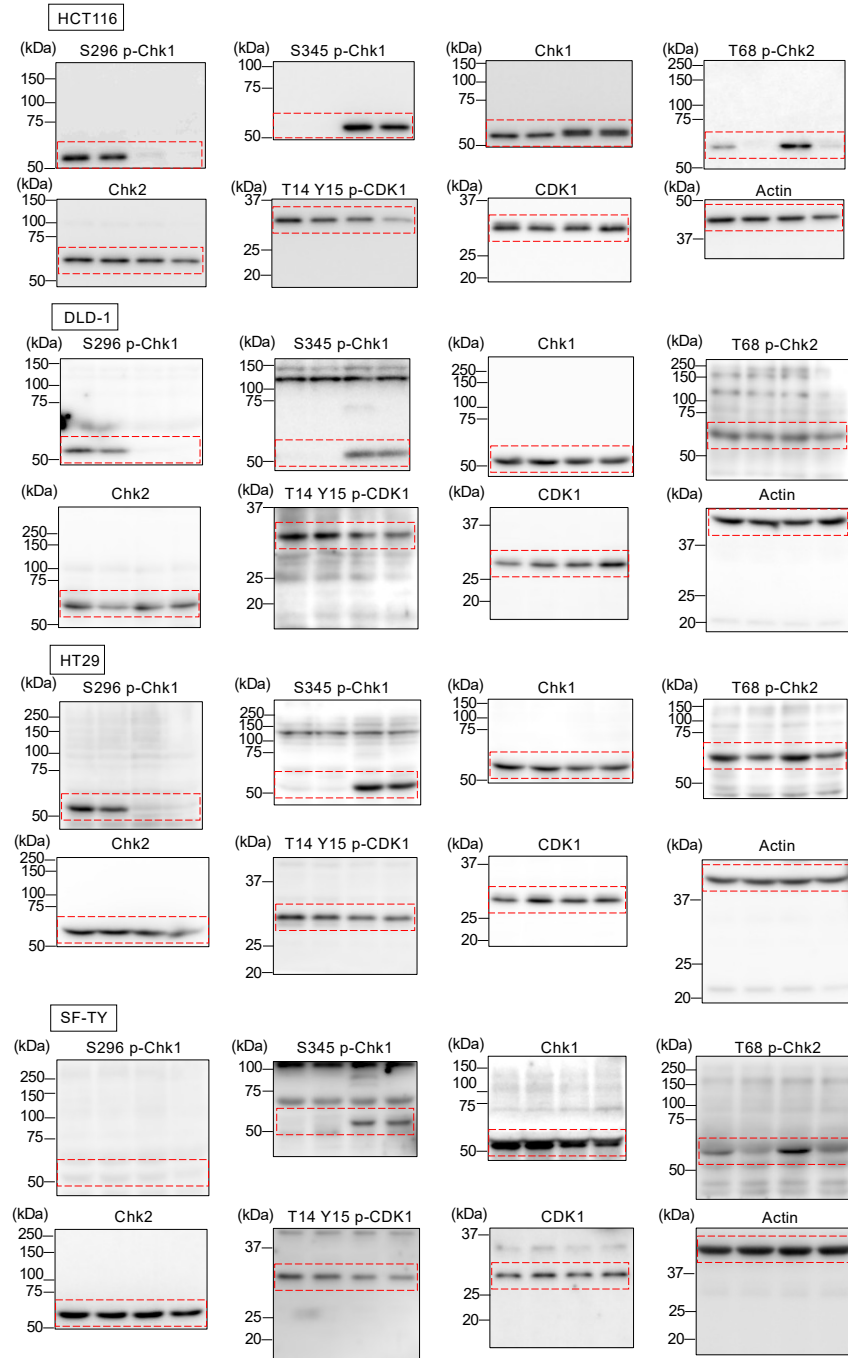

## B Relative intensity of each band

|                      | HCT116 cells |       |       |             | DLD-1 cells |       |       |             | HT29 cells |       |       |             | SF-TY cells |       |       |             |
|----------------------|--------------|-------|-------|-------------|-------------|-------|-------|-------------|------------|-------|-------|-------------|-------------|-------|-------|-------------|
|                      | Control      | ATMi  | Chk1i | Combination | Control     | ATMi  | Chk1i | Combination | Control    | ATMi  | Chk1i | Combination | Control     | ATMi  | Chk1i | Combination |
| S296 p-Chk1/Actin    | 2.843        | 2.607 | 0.337 | 0.052       | 1.166       | 0.687 | 0.036 | 0.00        | 1.622      | 1.170 | 0.446 | 0.238       | 0.409       | 0.517 | 0.370 | 0.242       |
| S345 p-Chk1/Actin    | 0.008        | 0.022 | 1.200 | 1.271       | 0.071       | 0.028 | 0.827 | 0.679       | 0.063      | 0.077 | 1.171 | 1.182       | 0.987       | 1.595 | 4.489 | 4.407       |
| Chk1/Actin           | 0.485        | 0.473 | 0.704 | 0.878       | 1.244       | 1.092 | 0.995 | 0.9379      | 1.489      | 1.240 | 0.928 | 1.011       | 0.973       | 0.943 | 0.626 | 0.573       |
| T68 p-Chk2/Actin     | 0.224        | 0.077 | 0.717 | 0.000       | 0.983       | 0.779 | 0.906 | 0.673       | 1.236      | 0.732 | 1.200 | 0.926       | 5.058       | 3.298 | 6.538 | 5.182       |
| Chk2/Actin           | 0.962        | 1.021 | 0.977 | 0.935       | 1.020       | 0.619 | 0.905 | 0.747       | 1.193      | 1.218 | 1.030 | 0.759       | 1.181       | 0.953 | 0.974 | 0.832       |
| T14 Y15 p-CDK1/Actin | 0.895        | 0.744 | 0.689 | 0.467       | 1.950       | 1.482 | 1.068 | 1.012       | 1.216      | 0.874 | 0.619 | 0.606       | 4.757       | 4.264 | 3.245 | 3.036       |
| CDK1/Actin           | 0.919        | 0.797 | 0.895 | 1.337       | 0.597       | 0.713 | 0.754 | 0.935       | 0.746      | 0.932 | 0.709 | 0.773       | 0.410       | 0.445 | 0.388 | 0.495       |

**Figure S3. Supplemental information for Western blotting analyses**

(A) Uncropped versions of the immunoblots shown in Figure 2 and Supplementary Figure S2. (B) Relative intensity of each band of the immunoblots shown in Figure 2 and Supplementary Figure S2.

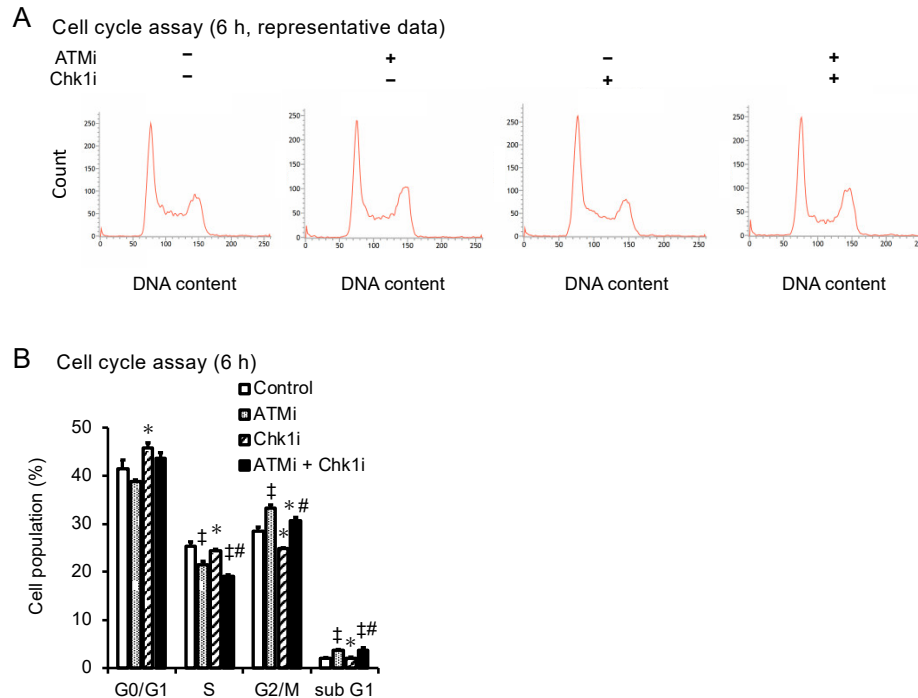

**Figure S4. Analysis of cell cycle progression of cancer and normal cells under combined ATMi and Chk1i treatment for 6 h**

(A) Representative results of assays of cell cycle progression of HCT116 cells treated with ATMi (10  $\mu$ M), Chk1i (0.03  $\mu$ M), or both drugs for 6 h, as determined by flow cytometry using PI staining. (B) Percentage of HCT116 cells in each cell cycle phase, as determined by PI staining. Data are presented as mean  $\pm$  SE ( $n = 3$ ; ‡ $p < 0.05$ , vs. control; \* $p < 0.05$ , vs. ATMi group, # $p < 0.05$ , vs. Chk1i group; Tukey's multiple

**Correlation of  $\gamma$ H2AX-positive cells and cell cycle progression**

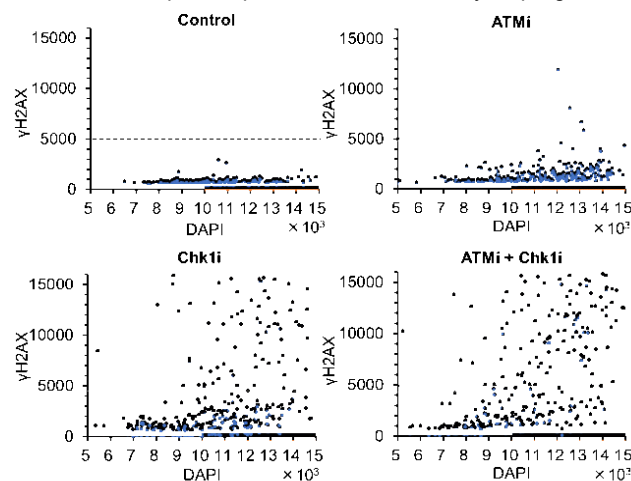

comparison test).

**Figure S5. Analysis of the relationship between  $\gamma$ H2AX-positive cells and cell cycle progression in cancer cells**

Fluorescence intensity of  $\gamma$ H2AX plotted against that of DAPI (300 cells in each group).

Based on the histogram of fluorescence intensity of DAPI in the control group, areas corresponding to the S and G2/M phases are indicated by orange bars.

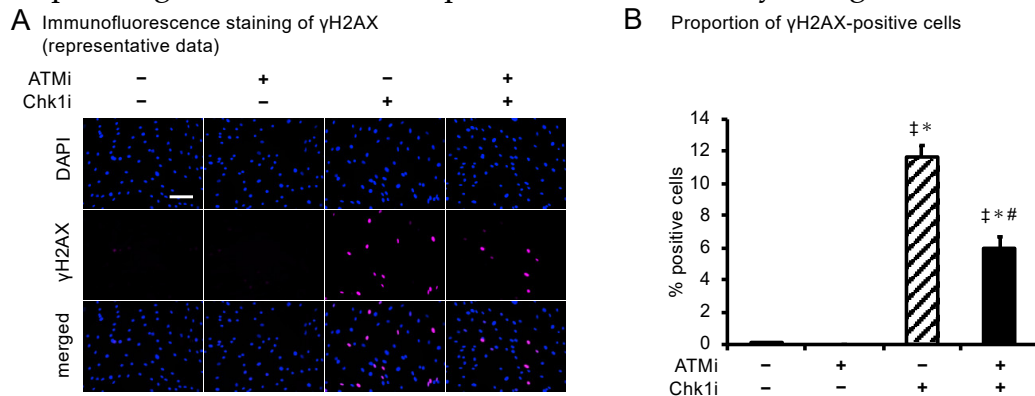

### Figure S6. Analysis of DNA damage in normal cells under combined ATMi and Chk1i treatment

(A) Immunofluorescence staining of  $\gamma$ H2AX (pink) in SF-TY cells treated with ATMi (10  $\mu$ M), Chk1i (0.03  $\mu$ M), or both drugs for 48 h. DAPI = blue. Scale bar = 100  $\mu$ m. (B) Ratio (%) of  $\gamma$ H2AX-positive SF-TY cells. Data are presented as mean  $\pm$  SE ( $n = 6$ ; 6 fields/well; ‡ $p < 0.05$ , vs. control; \* $p < 0.05$ , vs. ATMi group, # $p < 0.05$ , vs. Chk1i group; Tukey's multiple comparison test).

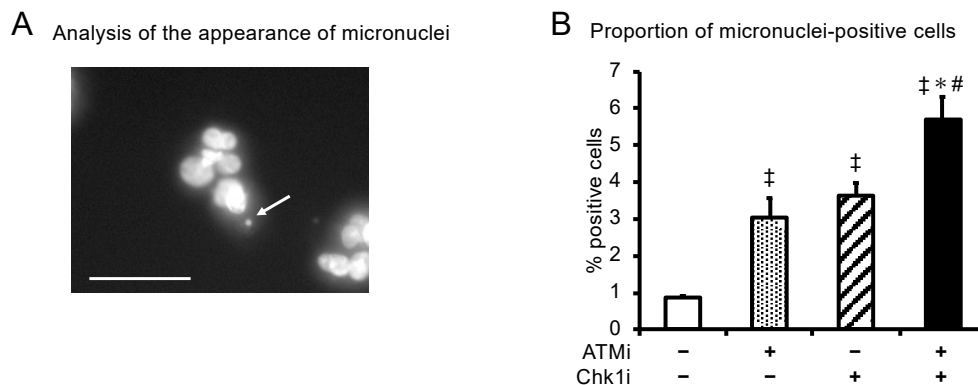

### Figure S7. Analysis of the appearance of micronuclei in cells treated with the ATMi and Chk1i combination

(A) Representative image of micronuclei in HCT116 cells treated with the ATMi (10  $\mu$ M) and Chk1i (0.03  $\mu$ M) combination. Cells associated with micronuclei were detected using Harmony software. (B) Ratio (%) of micronuclei-positive HCT116 cells. Data are presented as mean  $\pm$  SE ( $n = 6$ ; 6 fields/well; ‡ $p < 0.05$ , vs. control; \* $p < 0.05$ , vs. ATMi group, # $p < 0.05$ , vs. Chk1i group; Tukey's multiple comparison test).

**Table S1. Antibodies used in Western blotting analyses**

| Target                         | Source     | Catalog number | Species | Dilution |
|--------------------------------|------------|----------------|---------|----------|
| Phospho-Chk1 (S296)            | CST        | 2349           | Rabbit  | 1:1000   |
| Phospho-Chk1 (S345)            | CST        | 2348           | Rabbit  | 1:1000   |
| Chk1                           | CST        | 2360           | Mouse   | 1:1000   |
| Phospho-Chk2 (T68)             | CST        | 2197           | Rabbit  | 1:1000   |
| Chk2                           | CST        | 6334           | Rabbit  | 1:1000   |
| Phospho-CDK1 (cdc2) (T14, Y15) | Invitrogen | 44-686G        | Mouse   | 1:1000   |
| CDK1 (cdc2)                    | CST        | 9116           | Mouse   | 1:1000   |
| Actin                          | Sigma      | A5060          | Rabbit  | 1:1000   |

CST, Cell Signaling Technology.

**Table S2. IC<sub>50</sub> values of the ATMi and Chk1i**

| IC <sub>50</sub> | ATMi (μM) | CHK1i (μM) |
|------------------|-----------|------------|
| HCT116           | 18.4      | 2.79       |
| DLD-1            | 26.5      | 0.56       |
| HT29             | 8.91      | 24.2       |

**Table S3. CI values for HCT116, DLD-1, HT29, and SF-TY cells**

| Cell type | Value | ATMi 10 μM + Chk1i 0.03 μM | ATMi 10 μM + Chk1i 0.1 μM | ATMi 10 μM + Chk1i 0.3 μM | ATMi 10 μM + Chk1i 1 μM |
|-----------|-------|----------------------------|---------------------------|---------------------------|-------------------------|
| HCT116    | CI    | 0.63                       | 0.60                      | 0.68                      | 0.62                    |
|           | FA    | 0.44                       | 0.49                      | 0.49                      | 0.58                    |
|           |       | ATMi 10 μM + Chk1i 0.03 μM | ATMi 10 μM + Chk1i 0.1 μM | ATMi 10 μM + Chk1i 0.3 μM | ATMi 10 μM + Chk1i 1 μM |
| DLD-1     | CI    | 0.29                       | 0.29                      | 0.39                      | 0.62                    |
|           | FA    | 0.66                       | 0.71                      | 0.71                      | 0.74                    |
|           |       | ATMi 3 μM + Chk1i 0.3 nM   | ATMi 3 μM + Chk1i 1 nM    | ATMi 3 μM + Chk1i 3 nM    | ATMi 3 μM + Chk1i 10 nM |
| HT29      | CI    | 0.74                       | 0.78                      | 0.97                      | 0.90                    |
|           | FA    | 0.29                       | 0.29                      | 0.28                      | 0.44                    |
|           |       | ATMi 10 μM + Chk1i 0.03 μM | ATMi 10 μM + Chk1i 0.1 μM | ATMi 10 μM + Chk1i 0.3 μM | ATMi 10 μM + Chk1i 1 μM |
| SF-TY     | CI    | 0.70                       | 0.82                      | 1.50                      | 0.68                    |
|           | FA    | 0.29                       | 0.29                      | 0.28                      | 0.44                    |

CI, combination index; FA, fraction affected.
